# Supplementary material for: The Effect of Psychological First Aid Training on Knowledge and Understanding about Psychosocial Support Principles: A Cluster-Randomized Controlled Trial
Source: MDPI journal article supplement (doi:10.3390/ijerph17020484), 2020-01-11
Supplement: s1 [file s1]

**Table S1:** Fidelity of training to original Psychological First Aid model checklist.

| DOES THE COURSE INCLUDE CONTENT ON:                                                                                                                                                                                                                           | YES | PARTLY | NO | NOTES |
|---------------------------------------------------------------------------------------------------------------------------------------------------------------------------------------------------------------------------------------------------------------|-----|--------|----|-------|
| 1. What PFA is – e.g., “a humane, practical approach to people who recently suffered a crisis event”, listening without pressuring someone to talk, assessing needs and concerns, connecting people to other sources of support.                              | YES |        |    |       |
| 2. What PFA is not – e.g., not something only professionals can do, not “counselling”.                                                                                                                                                                        | YES |        |    |       |
| 3. What factors influence how people respond to a crisis event.                                                                                                                                                                                               |     |        | NO |       |
| 4. The "who, when, and where" of PFA.                                                                                                                                                                                                                         | YES |        |    |       |
| 5. The four main points of helping responsibly:<br>a. Respect safety, dignity and rights of people you help;<br>b. Adapt what you do to take account of the person’s culture;<br>c. Be aware of other emergency response measures;<br>d. Look after yourself. |     |        | NO |       |
| 6. How to stay safe while offering PFA.                                                                                                                                                                                                                       | YES |        |    |       |
| 7. Strategies for self and team care before, during and after helping in crisis situations.                                                                                                                                                                   |     |        | NO |       |

| DOES THE COURSE INCLUDE CONTENT ON:                                                     | YES | PARTLY | NO | NOTES |
|-----------------------------------------------------------------------------------------|-----|--------|----|-------|
| 8. Good communication skills, including:                                                |     |        |    |       |
| a. How to listen in a supportive way.                                                   |     |        |    |       |
| b. Being comfortable with silence                                                       |     |        |    |       |
| c. Acknowledging if someone tells you about a serious loss                              |     |        |    |       |
| d. Respecting privacy and keeping information confidential, where appropriate to do so. |     |        |    |       |
| e. Not making false promises or giving false information                                |     |        |    |       |
| f. Not judging the person's actions or feelings.                                        |     |        |    |       |
| 9. Knowing the PFA action principles of Prepare, Look, Listen and Link.                 |     |        |    |       |
| 10. How to use the 'Prepare' action principle, including:                               |     |        |    |       |
| a. How to approach a situation safely.                                                  |     |        |    |       |
| b. Learning about available services and supports in the context                        |     |        |    |       |
| c. Learning about the crisis event                                                      |     |        |    |       |

| DOES THE COURSE INCLUDE CONTENT ON:                                                                             | YES | PARTLY | NO | NOTES |
|-----------------------------------------------------------------------------------------------------------------|-----|--------|----|-------|
| 11. How to use the 'Look' action principle, including:                                                          |     |        |    |       |
| a. ~                                                                                                            |     |        |    |       |
| b. Checking for people with obvious urgent basic needs                                                          |     |        |    |       |
| c. How to recognise people in distress who may need support.                                                    |     |        |    |       |
| d. How to recognise and assist people who are likely to need special attention.                                 |     |        |    |       |
| 12. How to use the 'Listen' action principle, including:                                                        |     |        |    |       |
| a. How to approach people who may need support.                                                                 |     |        |    |       |
| b. How to ask about people's needs and concerns                                                                 |     |        |    |       |
| c. What to say and do in order to be helpful to someone in distress.                                            |     |        |    |       |
| d. What not to say and do when helping people affected by crisis events (so that you don't cause further harm). |     |        |    |       |
| e. Being respectful of culture, gender, age of the affected person                                              |     |        |    |       |
| f. Finding out what is most important to a person at this moment (their priorities)                             |     |        |    |       |
| g. Acknowledging a person's strengths                                                                           |     |        |    |       |

| <b>DOES THE COURSE INCLUDE CONTENT ON:</b>                                                                             | <b>YES</b> | <b>PARTLY</b> | <b>NO</b> | <b>NOTES</b> |
|------------------------------------------------------------------------------------------------------------------------|------------|---------------|-----------|--------------|
| 13. How to use the 'Link' action principle, including:                                                                 |            |               |           |              |
| a. Helping people access basic needs and services (including health services)                                          |            |               |           |              |
| b. Helping people cope with problems                                                                                   |            |               |           |              |
| c. Giving information (e.g., providing factual information, being clear about what the helper does and does not know). |            |               |           |              |
| d. Connecting people with loved ones and social support (in safe ways that do not risk the spread of infection)        |            |               |           |              |
| e. Understanding your role and the limits of your role (i.e. when to refer)                                            |            |               |           |              |
| f. How to connect and refer to other services in the context you work in.                                              |            |               |           |              |
| 14. Ending one's assistance in a positive way and ensuring the person has what they need for follow-up as necessary.   |            |               |           |              |
| <b>ARE PARTICIPANTS GIVEN:</b>                                                                                         | <b>YES</b> | <b>PARTLY</b> | <b>NO</b> | <b>NOTES</b> |
| 15. An opportunity to practice the supportive listening skills                                                         |            |               |           |              |
| 16. An opportunity to practice the PFA skills in a role play/ simulation                                               |            |               |           |              |
| 17. Feedback on their PFA and communication skills                                                                     |            |               |           |              |
| 18. A pre- and post-training knowledge assessment                                                                      |            |               |           |              |

**Table S2:** Summary statistics and results from mixed model analysis of primary and secondary outcomes in Intention-To-Treat sample (n = 408).

| Outcomes                            | Time point | Descriptive statistics |                      | Mixed model analysis *                 |         |
|-------------------------------------|------------|------------------------|----------------------|----------------------------------------|---------|
|                                     |            | PFA<br>(n = 206)       | Control<br>(n = 202) | Difference in LS<br>mean<br>(95%CI) ** | p-value |
| <i>Knowledge retention score</i>    | Baseline   | 12.14 (3.47)           | 12.18 (3.08)         |                                        |         |
|                                     | Post-PFA   | 13.64 (3.59)           | 12.34 (3.24)         | 1.26 (0.58–1.95)                       | 0.0003  |
|                                     | Follow-up  | 13.78 (3.56)           | 12.19 (3.08)         | 1.13 (0.40–1.85)                       | 0.0024  |
| <i>Scenario score</i>               | Baseline   | 2.88 (1.45)            | 2.77 (1.32)          |                                        |         |
|                                     | Post-PFA   | 3.20 (1.46)            | 3.17 (1.37)          | 0.02 (–0.28–0.32)                      | 0.88    |
|                                     | Follow-up  | 3.42 (1.52)            | 2.98 (1.37)          | 0.46 (0.16–0.76)                       | 0.003   |
| <i>Professional attitude</i>        | Baseline   | 30.22 (5.40)           | 30.59 (5.28)         |                                        |         |
|                                     | Post-PFA   | 31.73 (4.96)           | 30.53 (5.22)         | 0.17 (–0.85–1.19)                      | 0.75    |
|                                     | Follow-up  | 31.07 (4.81)           | 30.35 (5.28)         | 0.72 (–0.32–1.76)                      | 0.17    |
| <i>Confidence</i>                   | Baseline   | 19.07 (4.53)           | 19.13 (4.44)         |                                        |         |
|                                     | Post-PFA   | 19.92 (4.36)           | 19.40 (4.03)         | 0.43 (–0.44–1.31)                      | 0.33    |
|                                     | Follow-up  | 19.43 (4.06)           | 19.22 (4.11)         | 0.17 (–0.66–1.01)                      | 0.68    |
| <i>Professional quality of life</i> | Baseline   | 36.49 (5.66)           | 36.36 (5.66)         |                                        |         |
|                                     | Post-PFA   | 36.40 (5.49)           | 36.40 (5.53)         | –0.17 (0.00–0.97)                      | 0.83    |
|                                     | Follow-up  | 36.57 (5.89)           | 36.57 (5.48)         | –0.04 (–1.23–1.15)                     | 0.95    |

PFA = Psychological First Aid. \* The mixed model included training, time, interaction between training and time as fixed effects, subject as random effect and PHU as fixed effect. \*\* Effect size is calculated by the difference in LS mean by standard deviation.
